# Supplementary material
Source: PubMed Central journal article supplement (PMC2875928)
Supplement: NIHMS74764-supplement-01.pdf [file NIHMS74764-supplement-01.pdf]

**Supplemental Data**

**Cell Host & Microbe, *Volume 4***

**Persistent Virus Infection Inhibits Type I Interferon Production by Plasmacytoid Dendritic Cells to Facilitate Opportunistic Infections**

Elina I. Zuniga, Li-Ying Liou, Lauren Mack, Marilyn Mendoza, and Michael BA Oldstone

**Please find the supplemental figures on the following pages.**

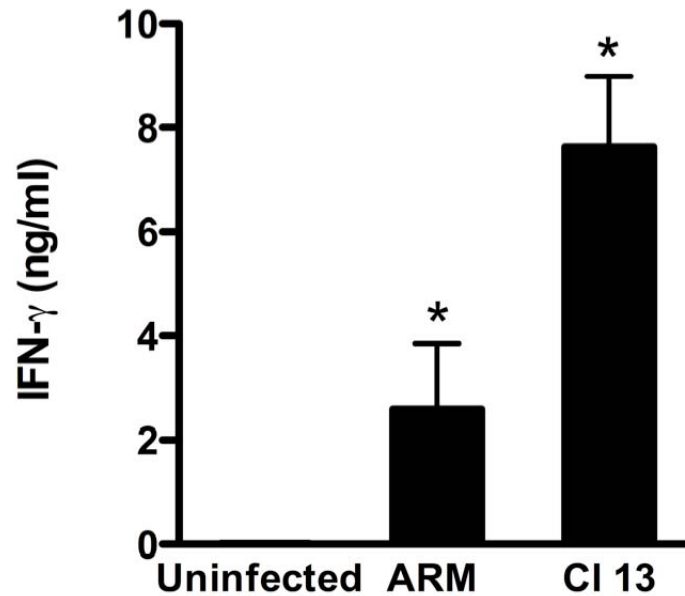

**Supplementary Figure 1. IFN- $\gamma$  production upon CPG stimulation.** Uninfected, ARM and CI 13 infected mice at day 5 pi were injected with 5  $\mu$ g of CPG. Blood samples were collected at 3.5 hs post-stimulation and IFN- $\gamma$  levels were determined by ELISA. Data represent results from 3-4 mice and show mean  $\pm$  s. d. (\*LCMV-infected compared to uninfected (day 0) group  $p < 0.01$ ). Results were confirmed by an additional experiment.

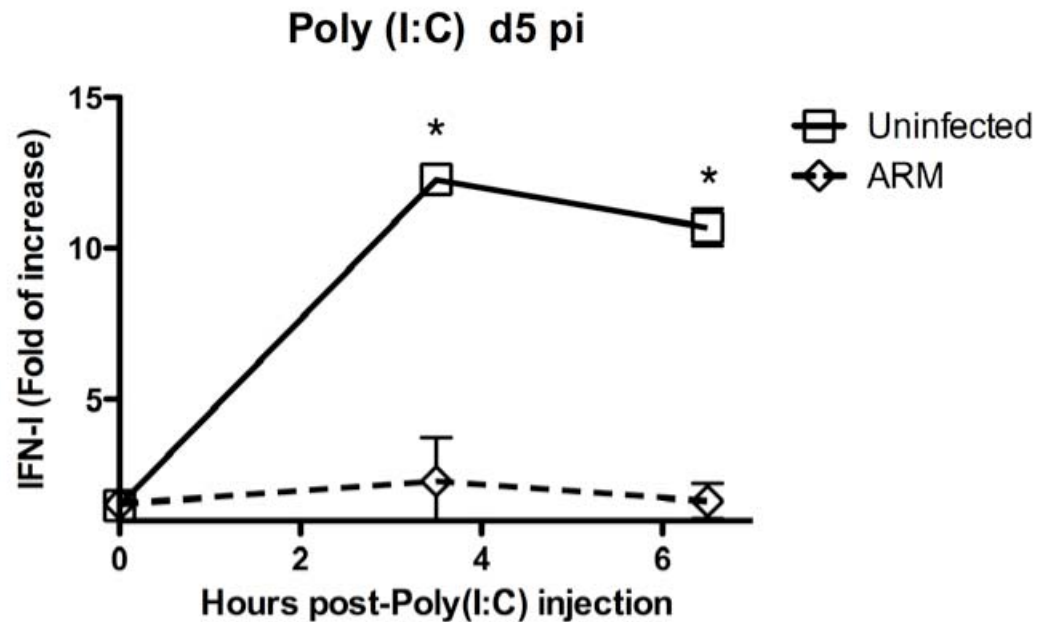

**Supplementary Figure 2. TLR-3-induced IFN-I response during LCMV infection.** Uninfected and ARM and infected mice at day 5 pi were injected with 5  $\mu$ g of Poly (I:C). Blood samples were collected at 3.5 and 6.5 hs post-stimulation and IFN-I levels were determined by Luciferase bioassay. Fold of increase respect to levels at 0 h is shown. Data represent results from 3-4 mice and shows mean  $\pm$  s. d. (\*LCMV-infected compared to uninfected (day 0) group  $p < 0.01$ ). Results are representative of two independent experiments.

**A****Day 5 pi**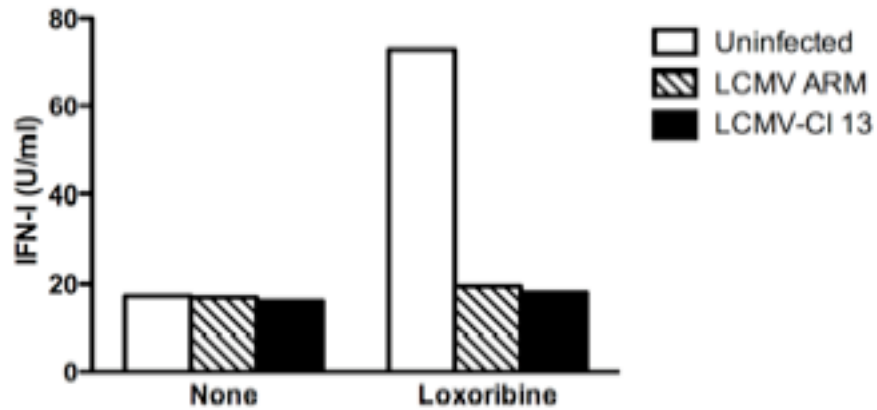**B****Day 30 pi**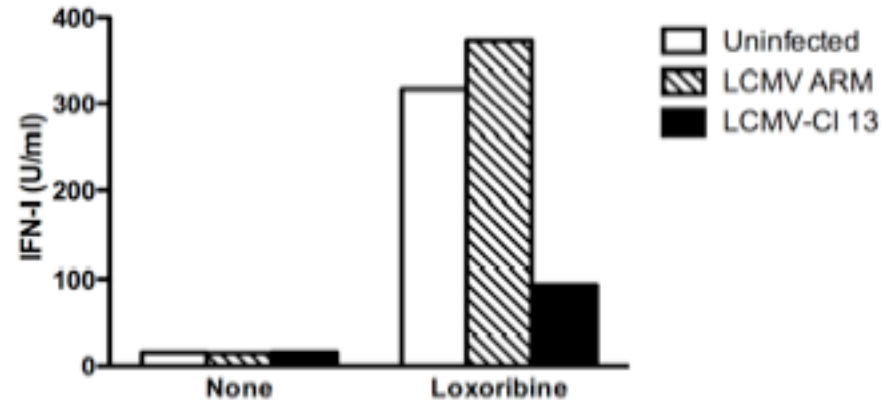

**Supplementary Figure 3. pDC-TLR-7-induced IFN-I response during LCMV infection.** FACS-purified pDCs were obtained from uninfected, ARM and CI 13 infected mice (day 5 and 30 pi). Cells were cultured with medium alone (none) or Loxoribine (TLR-7 ligand) and levels of IFN-I were measured in the supernatants at 12-15 h post-culture by Luciferase bioassay. Data are representative of two independent experiment for each time point.

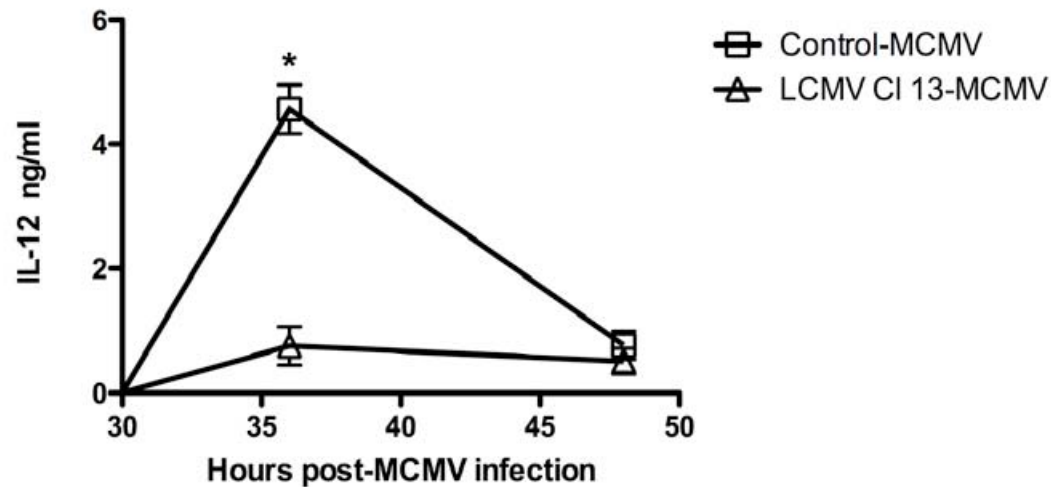

**Supplementary Figure 4. IL-12 production after MCMV primary and secondary infection.** Uninfected and LCMV CI 13 infected mice (day 21 pi) were injected with MCMV and blood samples collected at the indicated times after MCMV infection. IL-12 levels were measured by ELISA. The mean  $\pm$  s. d. obtained from 6 mice per group is shown. (\* Control-MCMV compared to LCMV-MCMV infected mice  $p < 0.01$ ).

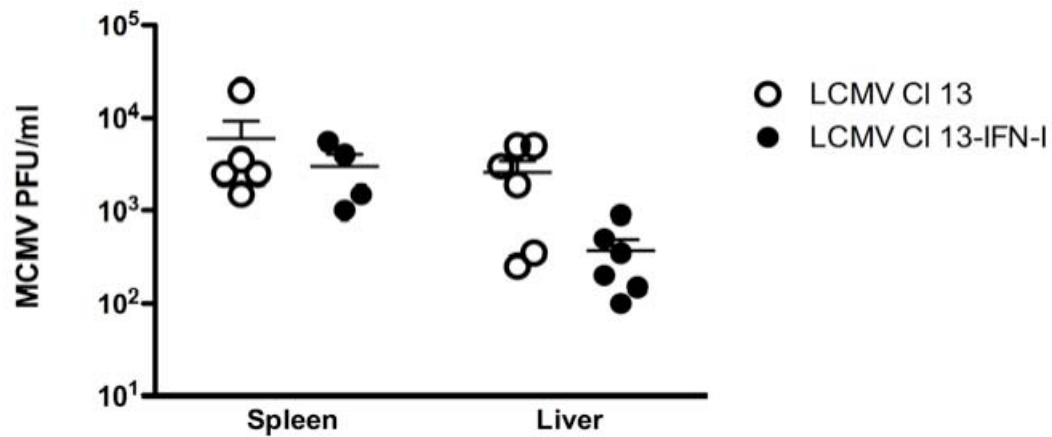

**Supplementary Figure 5. MCMV replication after a single dose of recombinant IFN- $\beta$ .** LCMV CI 13 infected mice (day 21 pi) were injected with  $1 \times 10^4$  units of recombinant IFN- $\beta$  1 h before MCMV infection. Spleens and livers were collected 4 days after MCMV infection and MCMV titers determined by plaque assay. The mean  $\pm$  s. d. obtained from 6 mice per group is shown. Each symbol represents an individual mouse.
